# Supplementary material for: Structure of the chromatin remodelling enzyme Chd1 bound to a ubiquitinylated nucleosome
Source: eLife journal article supplement (doi:10.7554/elife.35720), 2018-08-06

**A** Alignment of NS3 and Chd1 ATPase lobes separately

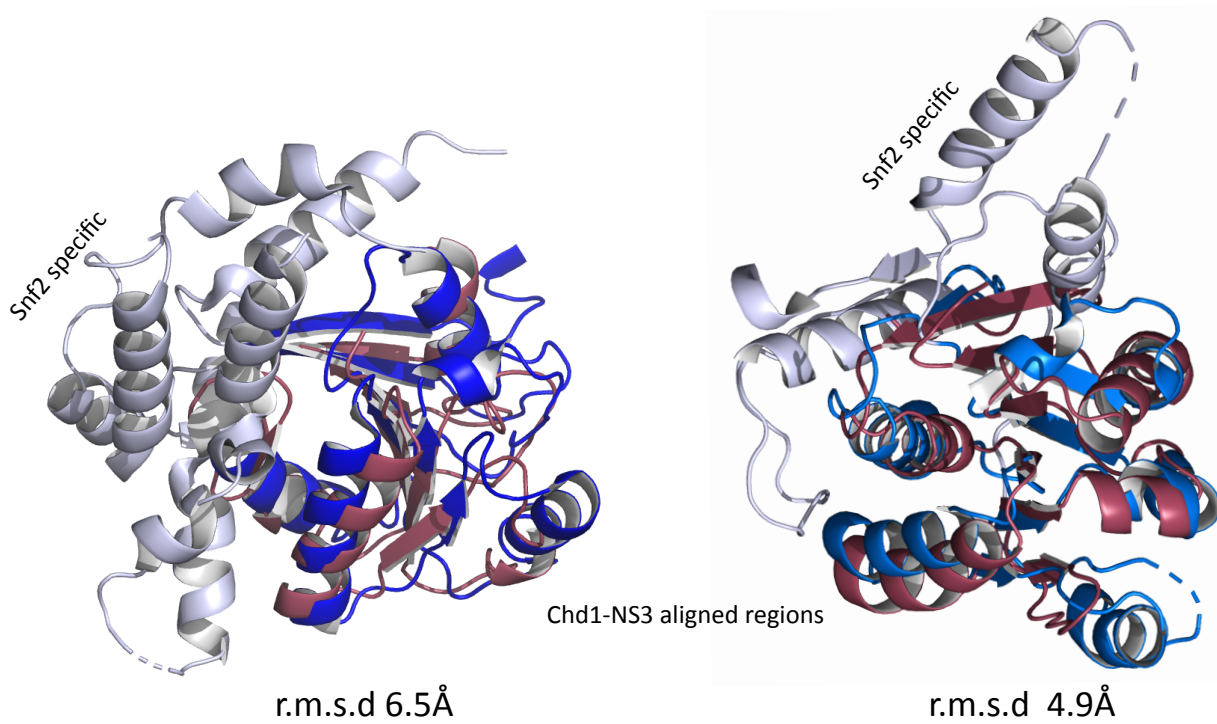

**B** Alignment of NS3 and Chd1 ATPase lobes in the closed state

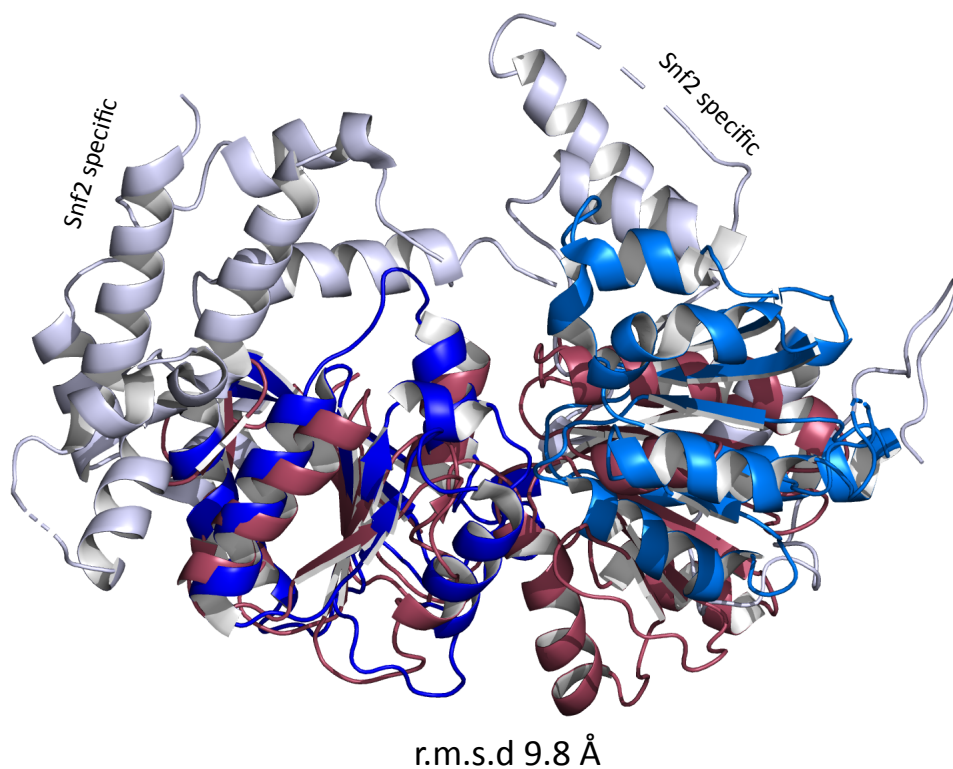

Supplement: supp [file elife-35720-supp-v1.zip]
