# Supplementary material for: Structure of the chromatin remodelling enzyme Chd1 bound to a ubiquitinylated nucleosome
Source: eLife journal article supplement (doi:10.7554/elife.35720), 2018-08-06
Supplement: supp [file elife-35720-supp-v1.zip]

Archive with 25 entries (25 files):
- elife_poa_e35720_Figure_1_figure_supplement_2.pdf
- elife_poa_e35720_Figure_2_figure_supplement_5.pdf
- elife_poa_e35720_Figure_4_Source_Data_1.csv
- elife_poa_e35720_Figure_8_figure_supplement_1.pdf
- elife_poa_e35720_Supplementary_File_1.docx
- elife_poa_e35720_Figure_6_figure_supplement_1.pdf
- elife_poa_e35720_Figure_8_source_data_1.pptx
- elife_poa_e35720_Figure_2_figure_supplement_1.pdf
- elife_poa_e35720_Figure_1_figure_supplement_3.pdf
- elife_poa_e35720_Figure_6_figure_supplement_2.pdf
- elife_poa_e35720_Figure_8_source_data_2.pptx
- elife_poa_e35720_Figure_2_figure_supplement_2.pdf
- elife_poa_e35720_Figure_7_figure_supplement_1.pdf
- elife_poa_e35720_Figure_2_figure_supplement_3.pdf
- elife_poa_e35720_Figure_1_source_data_1.pptx
- elife_poa_e35720_Figure_2_source_data_1.pptx
- elife_poa_e35720_Figure_8_source_data_4.pptx
- elife_poa_e35720_Figure_1_figure_supplement_5.pdf
- elife_poa_e35720_Transparent_Reporting_File.docx
- elife_poa_e35720_Figure_8_source_data_5.pptx
- elife_poa_e35720_Figure_8_source_data_3.pptx
- elife_poa_e35720_Figure_1_figure_supplement_4.pdf
- elife_poa_e35720_Figure_1_figure_supplement_1.pdf
- elife_poa_e35720_Figure_8_figure_supplement_2.pdf
- elife_poa_e35720_Figure_2_figure_supplement_4.pdf
