# Supplementary material for: Structure of the chromatin remodelling enzyme Chd1 bound to a ubiquitinylated nucleosome
Source: eLife journal article supplement (doi:10.7554/elife.35720), 2018-08-06
Supplement: supp [file elife-35720-supp-v1.zip › elife_poa_e35720_Figure_1_figure_supplement_5.pdf]

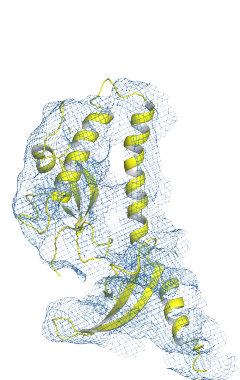

Chromo domain

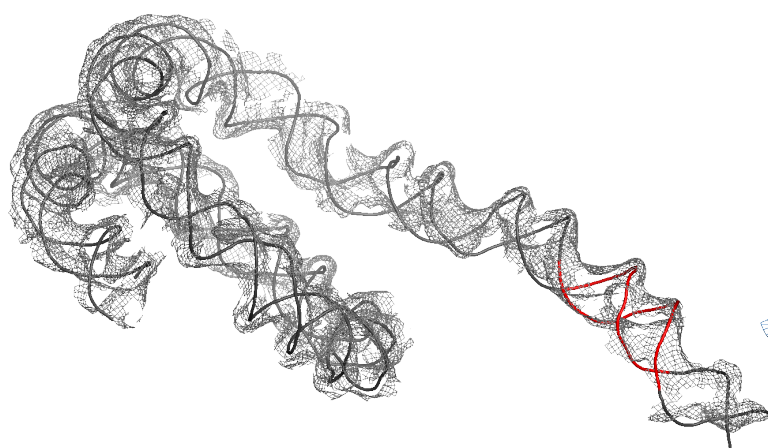

161bp DNA

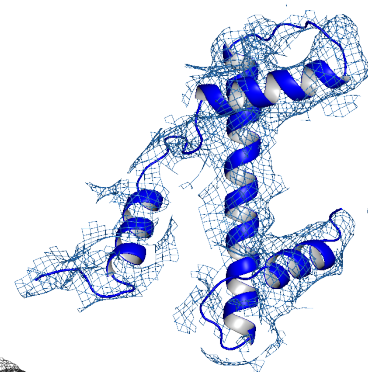

Histone H3

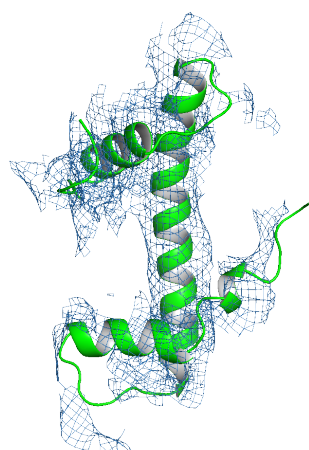

Histone H4

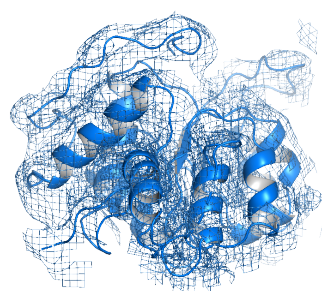

ATPase Lobe I

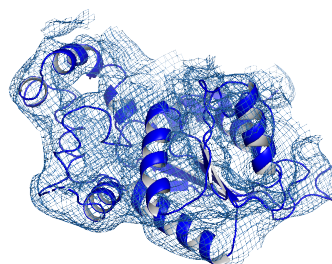

ATPase Lobe II

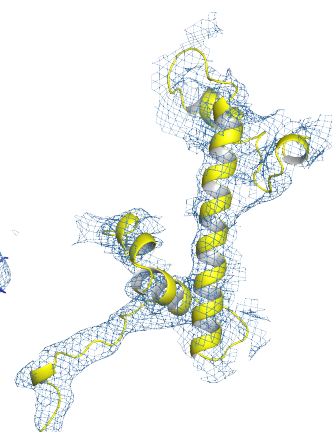

Histone H2A

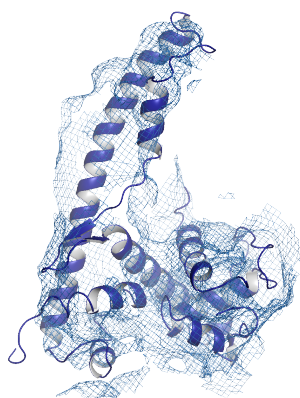

DNABD

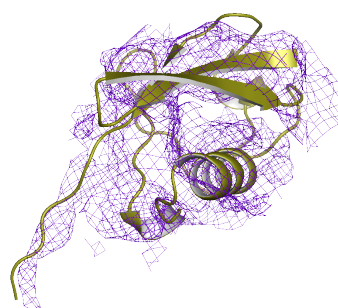

DNA unwrapped  
side Ubiquitin

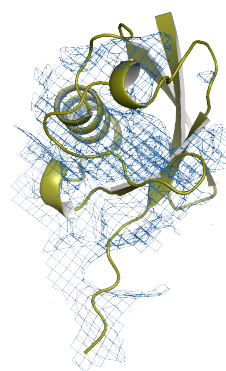

DNA wrapped  
side Ubiquitin

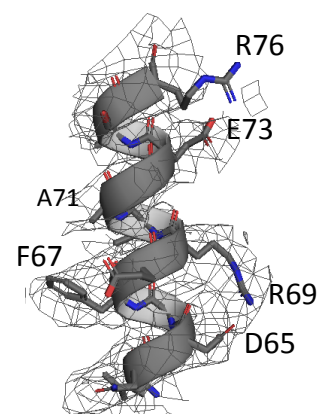

Histone H2B $\alpha$ 2
