# Supplementary material for: Structure of the chromatin remodelling enzyme Chd1 bound to a ubiquitinylated nucleosome
Source: eLife journal article supplement (doi:10.7554/elife.35720), 2018-08-06
Supplement: supp [file elife-35720-supp-v1.zip › elife_poa_e35720_Figure_2_figure_supplement_1.pdf]

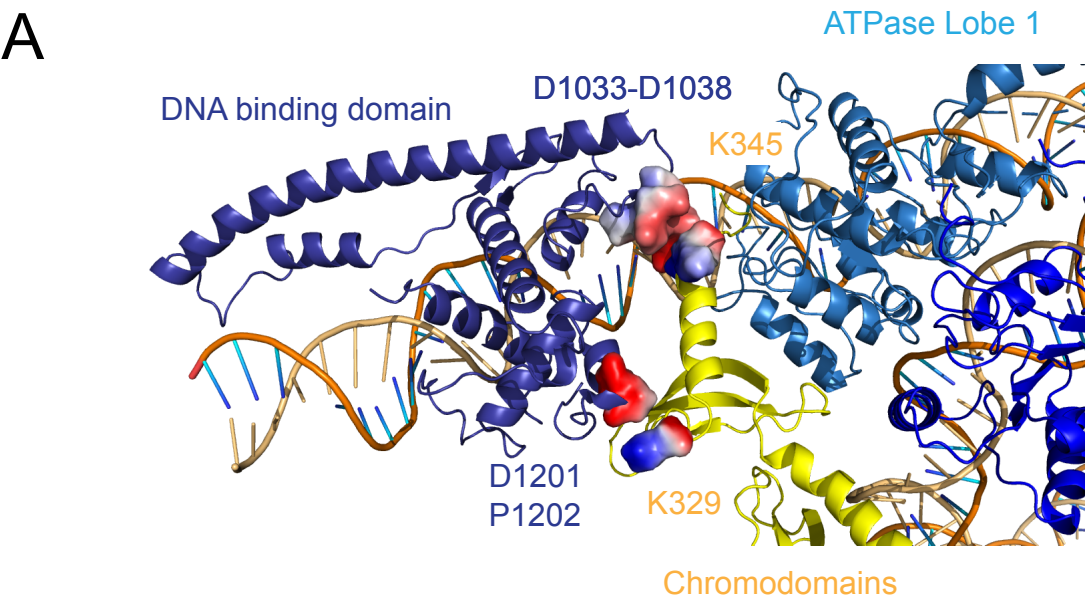

**B**

|                                 | D1033-D1038                       | D1201<br>P1202 |
|---------------------------------|-----------------------------------|----------------|
| <i>CHD1_Scerevisiae</i> /1-1468 | ... FGNLKEILDELADGTLFVKS...       | ... IRDDPFLGL  |
| <i>CHD1_Klactis</i> /1-1525     | ... FGDIENKFEELIADGSLPVKS...      | ... IRDDPFLGL  |
| <i>CHD1_Lwallti</i> /1-1436     | ... YGNLDDKFEELIADGSLPVKT...      | ... IRDDPFLGL  |
| <i>CHD1_Calbicans</i> /1-1412   | ... WGDLSGKWEQLVEEGSITNKN...      | ... IRDDPLLGL  |
| <i>CHD1_Drosophila</i> /1-1882  | ... FPAPLHRMEAIAEDAELQEK...       | ... MKLDP TLKL |
| <i>CHD1_HUMAN</i> /1-1710       | ... FGGPLERLDAIARDAELVDKS...      | ... IKMDPDL SL |
| <i>CHD2_HUMAN</i> /1-1828       | ... FGLPLERLECIARDAELVDKS...      | ... IKTDPELKL  |
| <i>Isw1_Scerevisiae</i> /1-1129 | ... YGRN... SIQAIARELA... PGKT... | RDEIRDCPLFEL   |
| <i>Isw2_Scerevisiae</i> /1-1120 | ... YGRD... DMENIKKSID... SKT...  | KQEIMMSDLFTF   |
| <i>ISW2_Calbicans</i> /1-1056   | ... YGRN... EYKKIAKALG... NKK...  | KDEILTS DIFKF  |
| <i>ISWI_Drosophila</i> /1-1027  | ... YGRD... DIDNIAKDVE... GKT...  | RAAIRAS PQFRF  |
| <i>SNF2H_HUMAN</i> /1-1052      | ... WGRD... DIENIAREVE... GKT...  | RQCIRNS PQFRF  |
| <i>SNF2_Scerevisiae</i> /1-1703 | GRGRGR... .. P...                 | ... RIYNT      |
| <i>STH1_Scerevisiae</i> /1-1359 | ... S... K... .. SPA              | ... RFYNE      |
| <i>SNF2_Calbicans</i> /1-1690   | GRGRGR... .. GR...                | ... KIYNE      |
| <i>BRG1_HUMAN</i> /1-1647       | ... ..                            | ... QTFNL      |
