# Supplementary material for: Structure of the chromatin remodelling enzyme Chd1 bound to a ubiquitinylated nucleosome
Source: eLife journal article supplement (doi:10.7554/elife.35720), 2018-08-06
Supplement: supp [file elife-35720-supp-v1.zip › elife_poa_e35720_Figure_2_figure_supplement_4.pdf]

|                         |                                              |
|-------------------------|----------------------------------------------|
| CHD1_Scorevisiae/1-1468 | VGT EYYKNILTKNYSALT . . . . AGAR GGHFSLNL    |
| CHD1_Klacta/1-1525      | VGT EYKYNILTKNYSALT . . . . SGIK GGHSFLNL    |
| CHD1_Lwalliti/1-1436    | VGT DYYKNILTKNYSALS . . . . AGSK GAHFSLLNL   |
| CHD1_Calbicans/1-1412   | IQT EYYKNIIITKNYAALN . . . . AGNR GSQSISLNL  |
| CHD1_Drosophila/1-1882  | LQKKYYKWILT KNFDA LR . . . . KGKR GSTSTGFLNL |
| CHD1_HUMAN/1-1710       | LQKKYYKWILT RNYKALS . . . . KGSR GSTSGFLNL   |
| CHD2_HUMAN/1-1828       | LQKKYYKWILT RNYKALA . . . . KGTR GSTSGFLNL   |
| low1_Scorevisiae/1-1129 | MQKKWYKKILE KDLDVAVNG . . . . SNGSK ESKTRLNL |
| low2_Scorevisiae/1-1120 | MQIQWKYLLEKD IDAVNG . . . . AVGKR EGKTRLNL   |
| ISW2_Calbicans/1-1056   | MQVEWYRKILE KDIDVANG . . . . VVGKR EKCKTRLNL |
| ISWL_Drosophila/1-1027  | MQRDWYTKVLLDK DVVN . . . . GAGK VEKMRLNL     |
| SNF2H_HUMAN/1-1052      | MQRWEYTRILMKD DILN . . . . SAGK MDKMRLNL     |
| SNF2_Scorevisiae/1-1703 | LQQIMYQMLKYRRLF IGD . . QN NKKMVGLRGFNL      |
| STH1_Scorevisiae/1-1359 | LQQLYQMLKHNA LFVAGTEG . ATK GGIGKLNL         |
| SNF2_Calbicans/1-1690   | LSLKLYQMRLMYNL A GDPANG . SVF VAIKANNL       |
| BRG1_HUMAN/1-1647       | LRVLRYRHMAQGLLLTGSEKDKKK . GGKTLNL           |
