# Supplementary material for: Structure of the chromatin remodelling enzyme Chd1 bound to a ubiquitinylated nucleosome
Source: eLife journal article supplement (doi:10.7554/elife.35720), 2018-08-06
Supplement: supp [file elife-35720-supp-v1.zip › elife_poa_e35720_Figure_4_Source_Data_1.csv]

	WT 524-256							ADP.BeFx 524-256
Distance	Probablity density	Normalised Probablity density					Distance	Probablity density	Normalised Probablity density
1.50E+00	0.00E+00	0.00E+00					1.50E+00	1.35E-02	4.52E-01
1.53E+00	1.81E-04	7.89E-03					1.55E+00	1.12E-02	3.73E-01
1.56E+00	3.64E-04	1.58E-02					1.59E+00	8.79E-03	2.94E-01
1.60E+00	5.49E-04	2.39E-02					1.64E+00	6.25E-03	2.09E-01
1.63E+00	7.37E-04	3.21E-02					1.69E+00	3.61E-03	1.21E-01
1.66E+00	9.29E-04	4.04E-02					1.73E+00	1.41E-03	4.72E-02
1.69E+00	1.12E-03	4.89E-02					1.78E+00	0.00E+00	0.00E+00
1.72E+00	1.32E-03	5.74E-02					1.83E+00	1.24E-04	4.14E-03
1.76E+00	1.52E-03	6.61E-02					1.88E+00	2.32E-03	7.78E-02
1.79E+00	1.72E-03	7.49E-02					1.92E+00	6.09E-03	2.04E-01
1.82E+00	1.93E-03	8.38E-02					1.97E+00	1.01E-02	3.36E-01
1.85E+00	2.13E-03	9.27E-02					2.02E+00	1.29E-02	4.32E-01
1.88E+00	2.34E-03	1.02E-01					2.06E+00	1.38E-02	4.63E-01
1.92E+00	2.54E-03	1.11E-01					2.11E+00	1.27E-02	4.24E-01
1.95E+00	2.74E-03	1.19E-01					2.16E+00	9.78E-03	3.27E-01
1.98E+00	2.93E-03	1.27E-01					2.20E+00	6.29E-03	2.10E-01
2.01E+00	3.11E-03	1.35E-01					2.25E+00	3.37E-03	1.13E-01
2.04E+00	3.27E-03	1.42E-01					2.30E+00	1.64E-03	5.50E-02
2.08E+00	3.42E-03	1.49E-01					2.35E+00	1.14E-03	3.81E-02
2.11E+00	3.55E-03	1.54E-01					2.39E+00	1.33E-03	4.46E-02
2.14E+00	3.65E-03	1.59E-01					2.44E+00	1.49E-03	4.97E-02
2.17E+00	3.73E-03	1.62E-01					2.49E+00	1.24E-03	4.15E-02
2.20E+00	3.78E-03	1.64E-01					2.53E+00	5.48E-04	1.83E-02
2.24E+00	3.80E-03	1.65E-01					2.58E+00	0.00E+00	0.00E+00
2.27E+00	3.79E-03	1.65E-01					2.63E+00	0.00E+00	0.00E+00
2.30E+00	3.76E-03	1.63E-01					2.67E+00	6.04E-04	2.02E-02
2.33E+00	3.70E-03	1.61E-01					2.72E+00	1.70E-03	5.68E-02
2.36E+00	3.61E-03	1.57E-01					2.77E+00	2.83E-03	9.47E-02
2.40E+00	3.50E-03	1.52E-01					2.81E+00	3.86E-03	1.29E-01
2.43E+00	3.36E-03	1.46E-01					2.86E+00	4.85E-03	1.62E-01
2.46E+00	3.21E-03	1.40E-01					2.91E+00	5.84E-03	1.95E-01
2.49E+00	3.04E-03	1.32E-01					2.96E+00	6.81E-03	2.28E-01
2.52E+00	2.86E-03	1.24E-01					3.00E+00	7.66E-03	2.56E-01
2.56E+00	2.67E-03	1.16E-01					3.05E+00	8.01E-03	2.68E-01
2.59E+00	2.47E-03	1.07E-01					3.10E+00	7.49E-03	2.51E-01
2.62E+00	2.27E-03	9.86E-02					3.14E+00	6.20E-03	2.07E-01
2.65E+00	2.07E-03	8.98E-02					3.19E+00	4.65E-03	1.56E-01
2.68E+00	1.86E-03	8.10E-02					3.24E+00	3.47E-03	1.16E-01
2.72E+00	1.66E-03	7.22E-02					3.28E+00	2.89E-03	9.68E-02
2.75E+00	1.46E-03	6.36E-02					3.33E+00	2.72E-03	9.10E-02
2.78E+00	1.27E-03	5.51E-02					3.38E+00	2.58E-03	8.63E-02
2.81E+00	1.08E-03	4.70E-02					3.43E+00	2.20E-03	7.35E-02
2.84E+00	9.03E-04	3.92E-02					3.47E+00	1.53E-03	5.13E-02
2.88E+00	7.37E-04	3.20E-02					3.52E+00	7.70E-04	2.58E-02
2.91E+00	5.85E-04	2.54E-02					3.57E+00	1.87E-04	6.27E-03
2.94E+00	4.47E-04	1.95E-02					3.61E+00	0.00E+00	0.00E+00
2.97E+00	3.26E-04	1.42E-02					3.66E+00	3.01E-04	1.01E-02
3.00E+00	2.21E-04	9.63E-03					3.71E+00	1.18E-03	3.94E-02
3.04E+00	1.35E-04	5.87E-03					3.75E+00	2.59E-03	8.68E-02
3.07E+00	6.95E-05	3.02E-03					3.80E+00	4.42E-03	1.48E-01
3.10E+00	2.60E-05	1.13E-03					3.85E+00	6.51E-03	2.18E-01
3.13E+00	3.75E-06	1.63E-04					3.90E+00	8.75E-03	2.93E-01
3.17E+00	0.00E+00	0.00E+00					3.94E+00	1.11E-02	3.71E-01
3.20E+00	1.07E-05	4.65E-04					3.99E+00	1.35E-02	4.52E-01
3.23E+00	4.45E-05	1.94E-03					4.04E+00	1.60E-02	5.36E-01
3.26E+00	1.08E-04	4.69E-03					4.08E+00	1.86E-02	6.21E-01
3.29E+00	2.05E-04	8.93E-03					4.13E+00	2.10E-02	7.04E-01
3.33E+00	3.41E-04	1.48E-02					4.18E+00	2.33E-02	7.80E-01
3.36E+00	5.18E-04	2.25E-02					4.22E+00	2.53E-02	8.47E-01
3.39E+00	7.36E-04	3.20E-02					4.27E+00	2.70E-02	9.03E-01
3.42E+00	9.93E-04	4.32E-02					4.32E+00	2.83E-02	9.45E-01
3.45E+00	1.29E-03	5.60E-02					4.36E+00	2.92E-02	9.76E-01
3.49E+00	1.62E-03	7.04E-02					4.41E+00	2.97E-02	9.95E-01
3.52E+00	1.99E-03	8.65E-02					4.46E+00	3.00E-02	1.00E+00
3.55E+00	2.40E-03	1.04E-01					4.51E+00	3.01E-02	1.01E+00
3.58E+00	2.84E-03	1.24E-01					4.55E+00	2.99E-02	1.00E+00
3.61E+00	3.32E-03	1.44E-01					4.60E+00	2.96E-02	9.90E-01
3.65E+00	3.83E-03	1.66E-01					4.65E+00	2.92E-02	9.75E-01
3.68E+00	4.36E-03	1.90E-01					4.69E+00	2.86E-02	9.56E-01
3.71E+00	4.92E-03	2.14E-01					4.74E+00	2.79E-02	9.34E-01
3.74E+00	5.51E-03	2.40E-01					4.79E+00	2.72E-02	9.10E-01
3.77E+00	6.12E-03	2.66E-01					4.83E+00	2.64E-02	8.84E-01
3.81E+00	6.76E-03	2.94E-01					4.88E+00	2.56E-02	8.57E-01
3.84E+00	7.44E-03	3.23E-01					4.93E+00	2.48E-02	8.30E-01
3.87E+00	8.13E-03	3.54E-01					4.98E+00	2.40E-02	8.03E-01
3.90E+00	8.86E-03	3.85E-01					5.02E+00	2.32E-02	7.77E-01
3.93E+00	9.62E-03	4.18E-01					5.07E+00	2.25E-02	7.52E-01
3.97E+00	1.04E-02	4.53E-01					5.12E+00	2.18E-02	7.28E-01
4.00E+00	1.12E-02	4.89E-01					5.16E+00	2.11E-02	7.05E-01
4.03E+00	1.21E-02	5.26E-01					5.21E+00	2.04E-02	6.82E-01
4.06E+00	1.30E-02	5.65E-01					5.26E+00	1.97E-02	6.59E-01
4.09E+00	1.39E-02	6.04E-01					5.30E+00	1.90E-02	6.37E-01
4.13E+00	1.48E-02	6.45E-01					5.35E+00	1.83E-02	6.13E-01
4.16E+00	1.58E-02	6.86E-01					5.40E+00	1.76E-02	5.89E-01
4.19E+00	1.67E-02	7.27E-01					5.44E+00	1.68E-02	5.63E-01
4.22E+00	1.76E-02	7.66E-01					5.49E+00	1.60E-02	5.36E-01
4.25E+00	1.85E-02	8.05E-01					5.54E+00	1.52E-02	5.07E-01
4.29E+00	1.93E-02	8.41E-01					5.59E+00	1.43E-02	4.77E-01
4.32E+00	2.01E-02	8.74E-01					5.63E+00	1.33E-02	4.45E-01
4.35E+00	2.08E-02	9.04E-01					5.68E+00	1.23E-02	4.12E-01
4.38E+00	2.14E-02	9.31E-01					5.73E+00	1.13E-02	3.78E-01
4.41E+00	2.19E-02	9.53E-01					5.77E+00	1.03E-02	3.43E-01
4.45E+00	2.24E-02	9.72E-01					5.82E+00	9.22E-03	3.09E-01
4.48E+00	2.27E-02	9.87E-01					5.87E+00	8.19E-03	2.74E-01
4.51E+00	2.29E-02	9.97E-01					5.91E+00	7.18E-03	2.40E-01
4.54E+00	2.31E-02	1.00E+00					5.96E+00	6.20E-03	2.07E-01
4.57E+00	2.31E-02	1.01E+00					6.01E+00	5.27E-03	1.76E-01
4.61E+00	2.31E-02	1.00E+00					6.06E+00	4.39E-03	1.47E-01
4.64E+00	2.30E-02	9.98E-01					6.10E+00	3.58E-03	1.20E-01
4.67E+00	2.27E-02	9.88E-01					6.15E+00	2.85E-03	9.53E-02
4.70E+00	2.24E-02	9.74E-01					6.20E+00	2.20E-03	7.34E-02
4.73E+00	2.20E-02	9.56E-01					6.24E+00	1.63E-03	5.44E-02
4.77E+00	2.15E-02	9.34E-01					6.29E+00	1.15E-03	3.84E-02
4.80E+00	2.09E-02	9.08E-01					6.34E+00	7.57E-04	2.53E-02
4.83E+00	2.02E-02	8.78E-01					6.38E+00	4.52E-04	1.51E-02
4.86E+00	1.94E-02	8.43E-01					6.43E+00	2.30E-04	7.70E-03
4.89E+00	1.85E-02	8.06E-01					6.48E+00	8.60E-05	2.88E-03
4.93E+00	1.76E-02	7.65E-01					6.52E+00	1.20E-05	4.03E-04
4.96E+00	1.66E-02	7.21E-01					6.57E+00	0.00E+00	0.00E+00
4.99E+00	1.55E-02	6.74E-01					6.62E+00	4.00E-05	1.34E-03
5.02E+00	1.44E-02	6.25E-01					6.67E+00	1.29E-04	4.31E-03
5.05E+00	1.32E-02	5.75E-01					6.71E+00	2.63E-04	8.78E-03
5.09E+00	1.21E-02	5.24E-01					6.76E+00	4.36E-04	1.46E-02
5.12E+00	1.09E-02	4.73E-01					6.81E+00	6.44E-04	2.15E-02
5.15E+00	9.71E-03	4.22E-01					6.85E+00	8.80E-04	2.94E-02
5.18E+00	8.56E-03	3.72E-01					6.90E+00	1.14E-03	3.81E-02
5.21E+00	7.45E-03	3.24E-01					6.95E+00	1.41E-03	4.72E-02
5.25E+00	6.39E-03	2.78E-01					6.99E+00	1.70E-03	5.67E-02
5.28E+00	5.39E-03	2.34E-01					7.04E+00	1.98E-03	6.63E-02
5.31E+00	4.45E-03	1.94E-01					7.09E+00	2.27E-03	7.58E-02
5.34E+00	3.60E-03	1.57E-01					7.14E+00	2.54E-03	8.50E-02
5.37E+00	2.84E-03	1.23E-01					7.18E+00	2.80E-03	9.37E-02
5.41E+00	2.16E-03	9.41E-02					7.23E+00	3.05E-03	1.02E-01
5.44E+00	1.58E-03	6.89E-02					7.28E+00	3.27E-03	1.09E-01
5.47E+00	1.10E-03	4.78E-02					7.32E+00	3.46E-03	1.16E-01
5.50E+00	7.11E-04	3.09E-02					7.37E+00	3.63E-03	1.21E-01
5.53E+00	4.13E-04	1.80E-02					7.42E+00	3.76E-03	1.26E-01
5.57E+00	2.01E-04	8.75E-03					7.46E+00	3.86E-03	1.29E-01
5.60E+00	6.84E-05	2.98E-03					7.51E+00	3.92E-03	1.31E-01
5.63E+00	5.14E-06	2.23E-04					7.56E+00	3.95E-03	1.32E-01
5.66E+00	0.00E+00	0.00E+00					7.60E+00	3.95E-03	1.32E-01
5.69E+00	3.99E-05	1.73E-03					7.65E+00	3.91E-03	1.31E-01
5.73E+00	1.23E-04	5.34E-03					7.70E+00	3.84E-03	1.28E-01
5.76E+00	2.45E-04	1.07E-02					7.75E+00	3.73E-03	1.25E-01
5.79E+00	4.03E-04	1.75E-02					7.79E+00	3.60E-03	1.20E-01
5.82E+00	5.89E-04	2.56E-02					7.84E+00	3.44E-03	1.15E-01
5.85E+00	7.99E-04	3.47E-02					7.89E+00	3.26E-03	1.09E-01
5.89E+00	1.02E-03	4.45E-02					7.93E+00	3.06E-03	1.02E-01
5.92E+00	1.26E-03	5.47E-02					7.98E+00	2.84E-03	9.49E-02
5.95E+00	1.49E-03	6.50E-02					8.03E+00	2.61E-03	8.72E-02
5.98E+00	1.72E-03	7.50E-02					8.07E+00	2.37E-03	7.92E-02
6.01E+00	1.94E-03	8.45E-02					8.12E+00	2.13E-03	7.11E-02
6.05E+00	2.14E-03	9.32E-02					8.17E+00	1.88E-03	6.29E-02
6.08E+00	2.32E-03	1.01E-01					8.22E+00	1.64E-03	5.49E-02
6.11E+00	2.47E-03	1.07E-01					8.26E+00	1.41E-03	4.71E-02
6.14E+00	2.59E-03	1.13E-01					8.31E+00	1.18E-03	3.96E-02
6.17E+00	2.67E-03	1.16E-01					8.36E+00	9.76E-04	3.26E-02
6.21E+00	2.72E-03	1.18E-01					8.40E+00	7.84E-04	2.62E-02
6.24E+00	2.74E-03	1.19E-01					8.45E+00	6.12E-04	2.05E-02
6.27E+00	2.72E-03	1.18E-01					8.50E+00	4.60E-04	1.54E-02
6.30E+00	2.66E-03	1.16E-01					8.54E+00	3.31E-04	1.11E-02
6.33E+00	2.58E-03	1.12E-01					8.59E+00	2.25E-04	7.51E-03
6.37E+00	2.46E-03	1.07E-01					8.64E+00	1.41E-04	4.72E-03
6.40E+00	2.32E-03	1.01E-01					8.69E+00	7.94E-05	2.66E-03
6.43E+00	2.16E-03	9.40E-02					8.73E+00	3.78E-05	1.26E-03
6.46E+00	1.99E-03	8.63E-02					8.78E+00	1.34E-05	4.49E-04
6.50E+00	1.80E-03	7.81E-02					8.83E+00	2.45E-06	8.20E-05
6.53E+00	1.60E-03	6.95E-02					8.87E+00	0.00E+00	0.00E+00
6.56E+00	1.40E-03	6.08E-02					8.92E+00	0.00E+00	0.00E+00
6.59E+00	1.20E-03	5.22E-02					8.97E+00	0.00E+00	0.00E+00
6.62E+00	1.01E-03	4.39E-02					9.01E+00	0.00E+00	0.00E+00
6.66E+00	8.29E-04	3.60E-02					9.06E+00	0.00E+00	0.00E+00
6.69E+00	6.61E-04	2.87E-02					9.11E+00	0.00E+00	0.00E+00
6.72E+00	5.10E-04	2.22E-02					9.15E+00	0.00E+00	0.00E+00
6.75E+00	3.78E-04	1.64E-02					9.20E+00	0.00E+00	0.00E+00
6.78E+00	2.66E-04	1.16E-02					9.25E+00	0.00E+00	0.00E+00
6.82E+00	1.75E-04	7.62E-03					9.30E+00	0.00E+00	0.00E+00
6.85E+00	1.05E-04	4.58E-03					9.34E+00	0.00E+00	0.00E+00
6.88E+00	5.54E-05	2.41E-03					9.39E+00	0.00E+00	0.00E+00
6.91E+00	2.34E-05	1.02E-03					9.44E+00	0.00E+00	0.00E+00
6.94E+00	6.23E-06	2.71E-04					9.48E+00	0.00E+00	0.00E+00
6.98E+00	9.35E-08	4.06E-06					9.53E+00	0.00E+00	0.00E+00
7.01E+00	0.00E+00	0.00E+00					9.58E+00	0.00E+00	0.00E+00
7.04E+00	0.00E+00	0.00E+00					9.62E+00	0.00E+00	0.00E+00
7.07E+00	0.00E+00	0.00E+00					9.67E+00	0.00E+00	0.00E+00
7.10E+00	0.00E+00	0.00E+00					9.72E+00	0.00E+00	0.00E+00
7.14E+00	0.00E+00	0.00E+00					9.77E+00	0.00E+00	0.00E+00
7.17E+00	0.00E+00	0.00E+00					9.81E+00	0.00E+00	0.00E+00
7.20E+00	0.00E+00	0.00E+00					9.86E+00	0.00E+00	0.00E+00
7.23E+00	0.00E+00	0.00E+00					9.91E+00	0.00E+00	0.00E+00
7.26E+00	0.00E+00	0.00E+00					9.95E+00	0.00E+00	0.00E+00
7.30E+00	0.00E+00	0.00E+00					1.00E+01	0.00E+00	0.00E+00
7.33E+00	0.00E+00	0.00E+00							0.00E+00
7.36E+00	0.00E+00	0.00E+00							0.00E+00
7.39E+00	7.60E-07	3.30E-05							0.00E+00
7.42E+00	5.54E-06	2.41E-04							0.00E+00
7.46E+00	1.69E-05	7.37E-04							0.00E+00
7.49E+00	3.70E-05	1.61E-03							0.00E+00
7.52E+00	6.72E-05	2.92E-03							0.00E+00
7.55E+00	1.09E-04	4.72E-03							0.00E+00
7.58E+00	1.61E-04	7.02E-03							0.00E+00
7.62E+00	2.26E-04	9.83E-03							0.00E+00
7.65E+00	3.02E-04	1.31E-02							0.00E+00
7.68E+00	3.89E-04	1.69E-02							0.00E+00
7.71E+00	4.87E-04	2.12E-02							0.00E+00
7.74E+00	5.93E-04	2.58E-02							0.00E+00
7.78E+00	7.07E-04	3.08E-02							0.00E+00
7.81E+00	8.29E-04	3.60E-02							0.00E+00
7.84E+00	9.55E-04	4.15E-02							0.00E+00
7.87E+00	1.09E-03	4.72E-02							0.00E+00
7.90E+00	1.22E-03	5.30E-02							0.00E+00
7.94E+00	1.36E-03	5.90E-02							0.00E+00
7.97E+00	1.49E-03	6.49E-02							0.00E+00
8.00E+00	1.63E-03	7.09E-02							0.00E+00
