# Supplementary figures and images for: Structure of the chromatin remodelling enzyme Chd1 bound to a ubiquitinylated nucleosome
Source: eLife journal article supplement (doi:10.7554/elife.35720), 2018-08-06

A

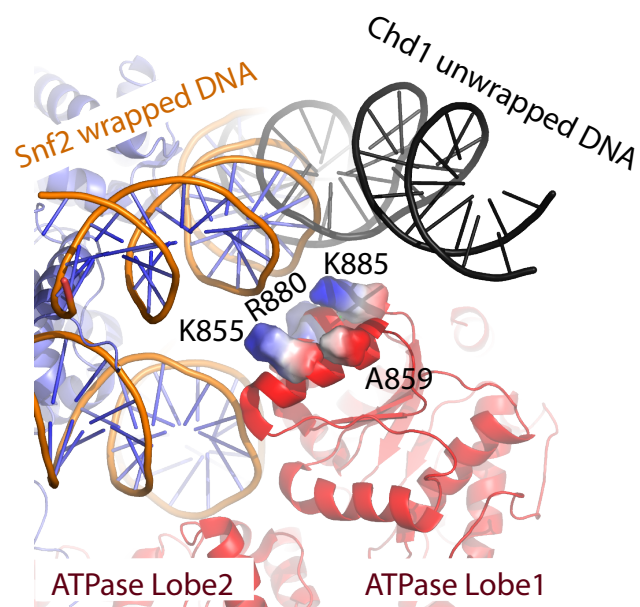

SNF2 lobe 1 interaction with adjacent gyre

B

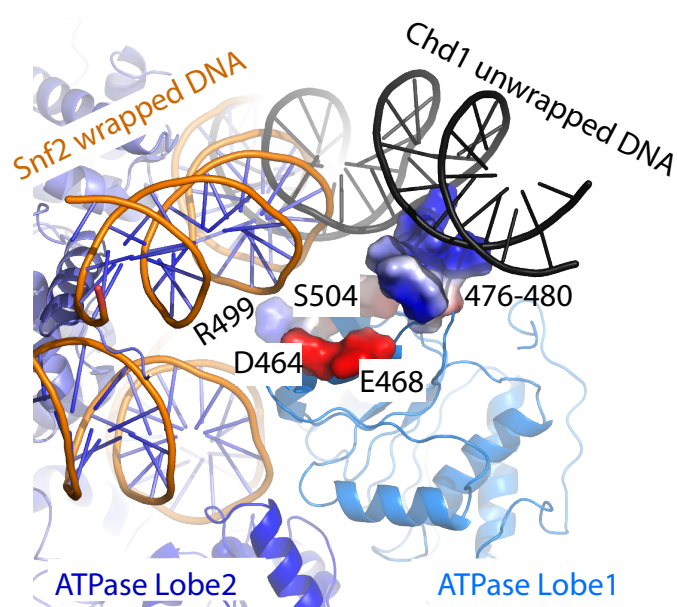

Chd1 lobe 1 interaction with unwrapped DNA

Supplement: supp [file elife-35720-supp-v1.zip]

A

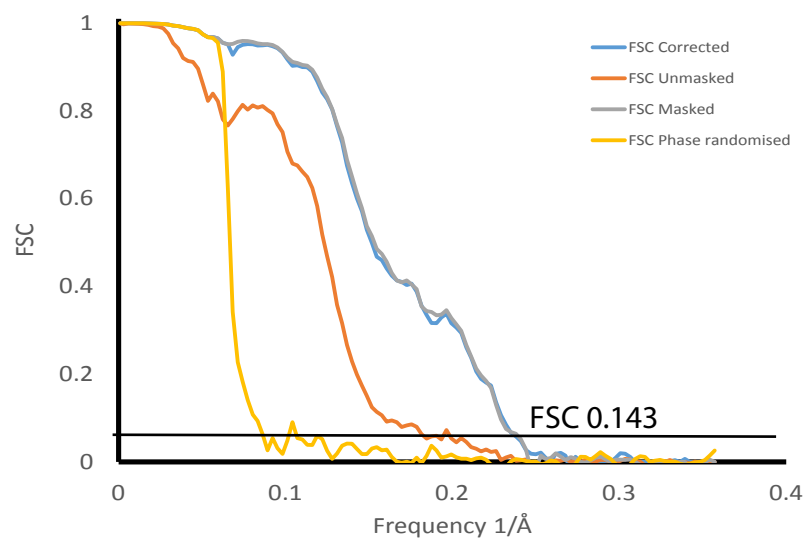

B

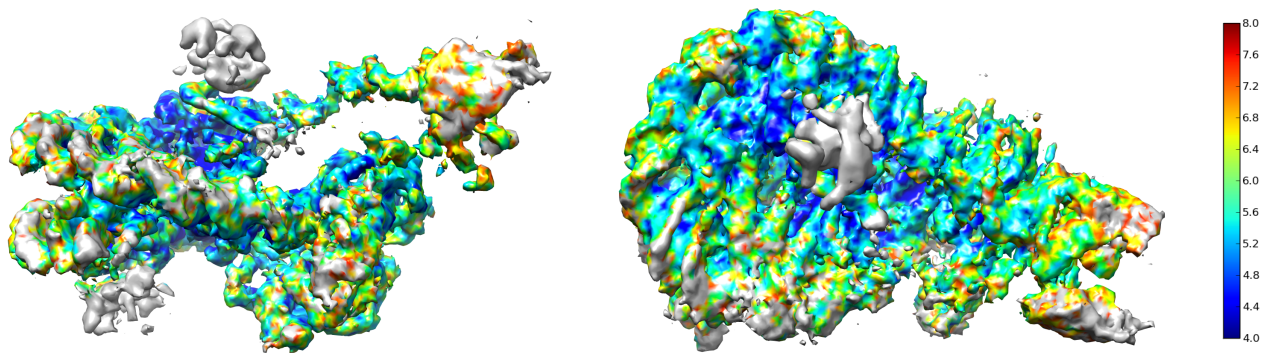

C

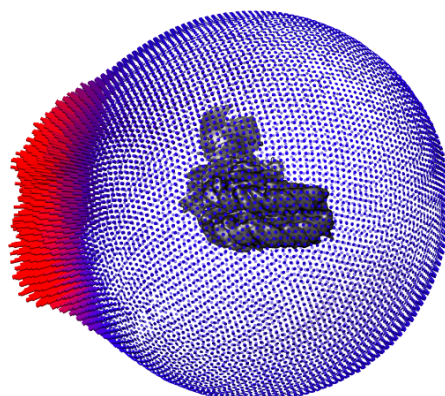

Supplement: supp [file elife-35720-supp-v1.zip]

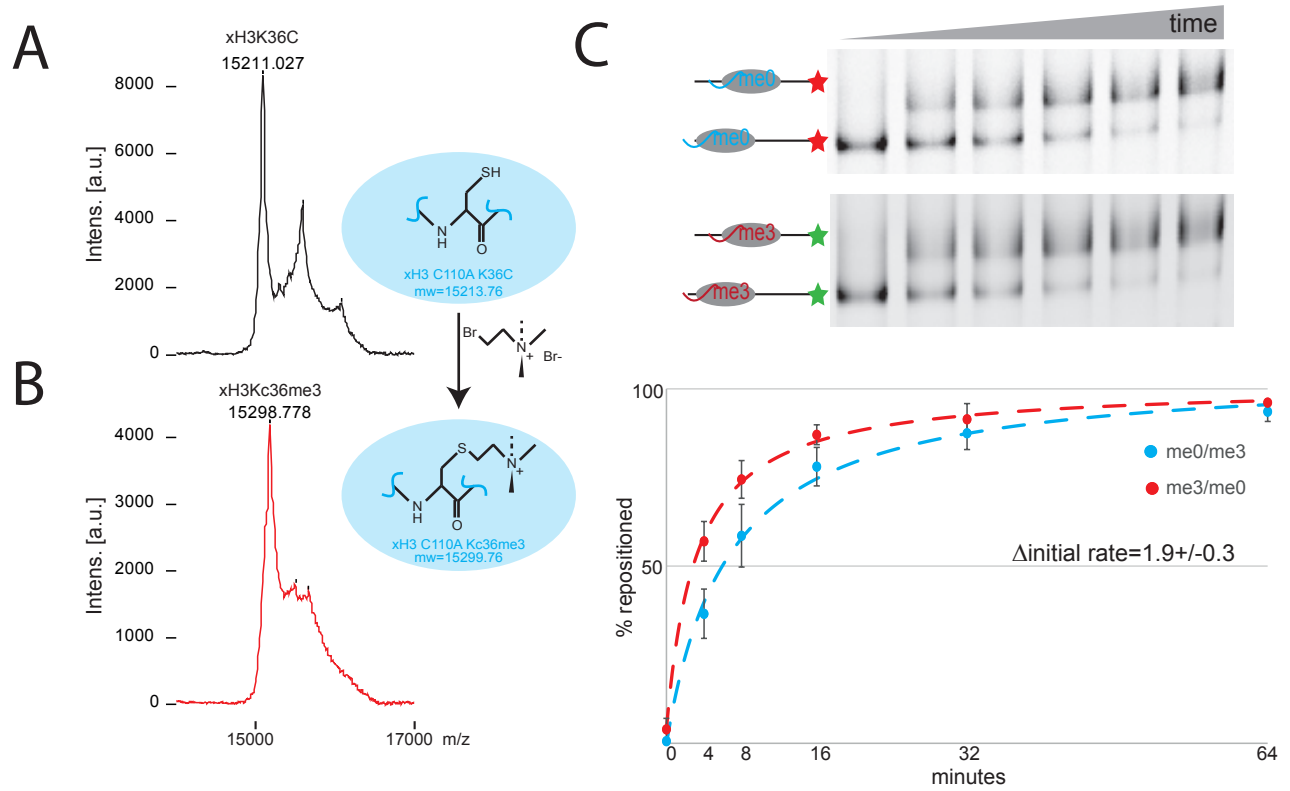

Supplement: supp [file elife-35720-supp-v1.zip]

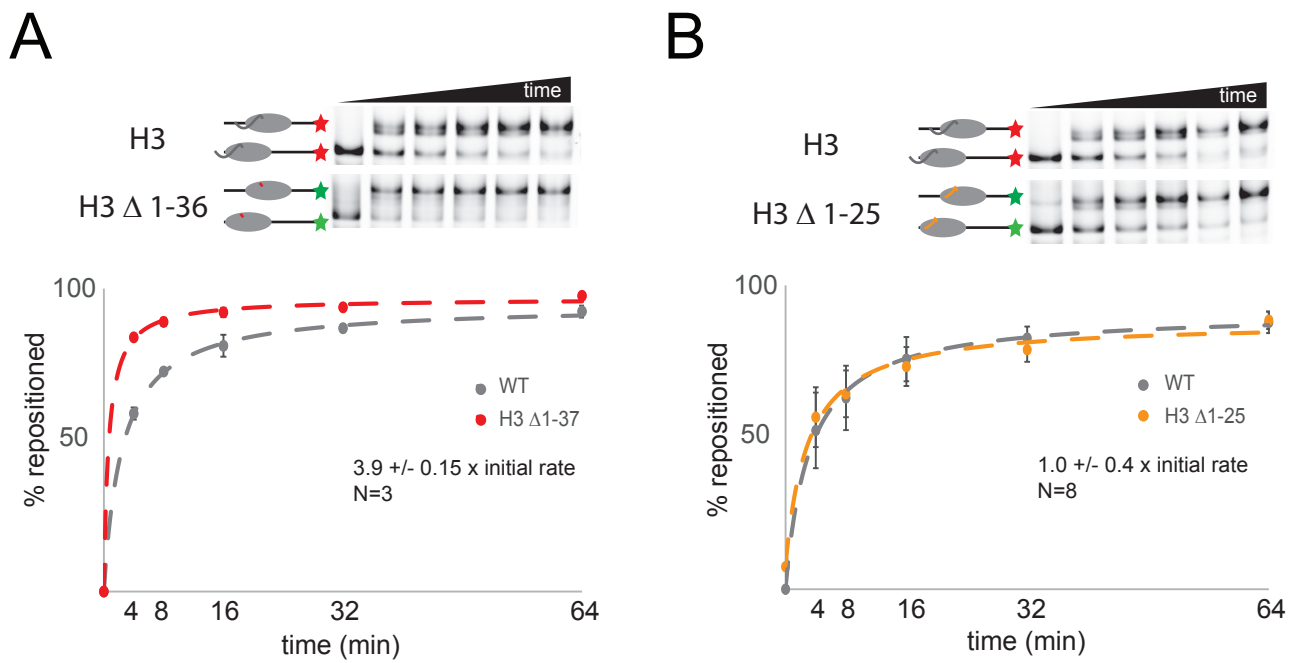

Supplement: supp [file elife-35720-supp-v1.zip]

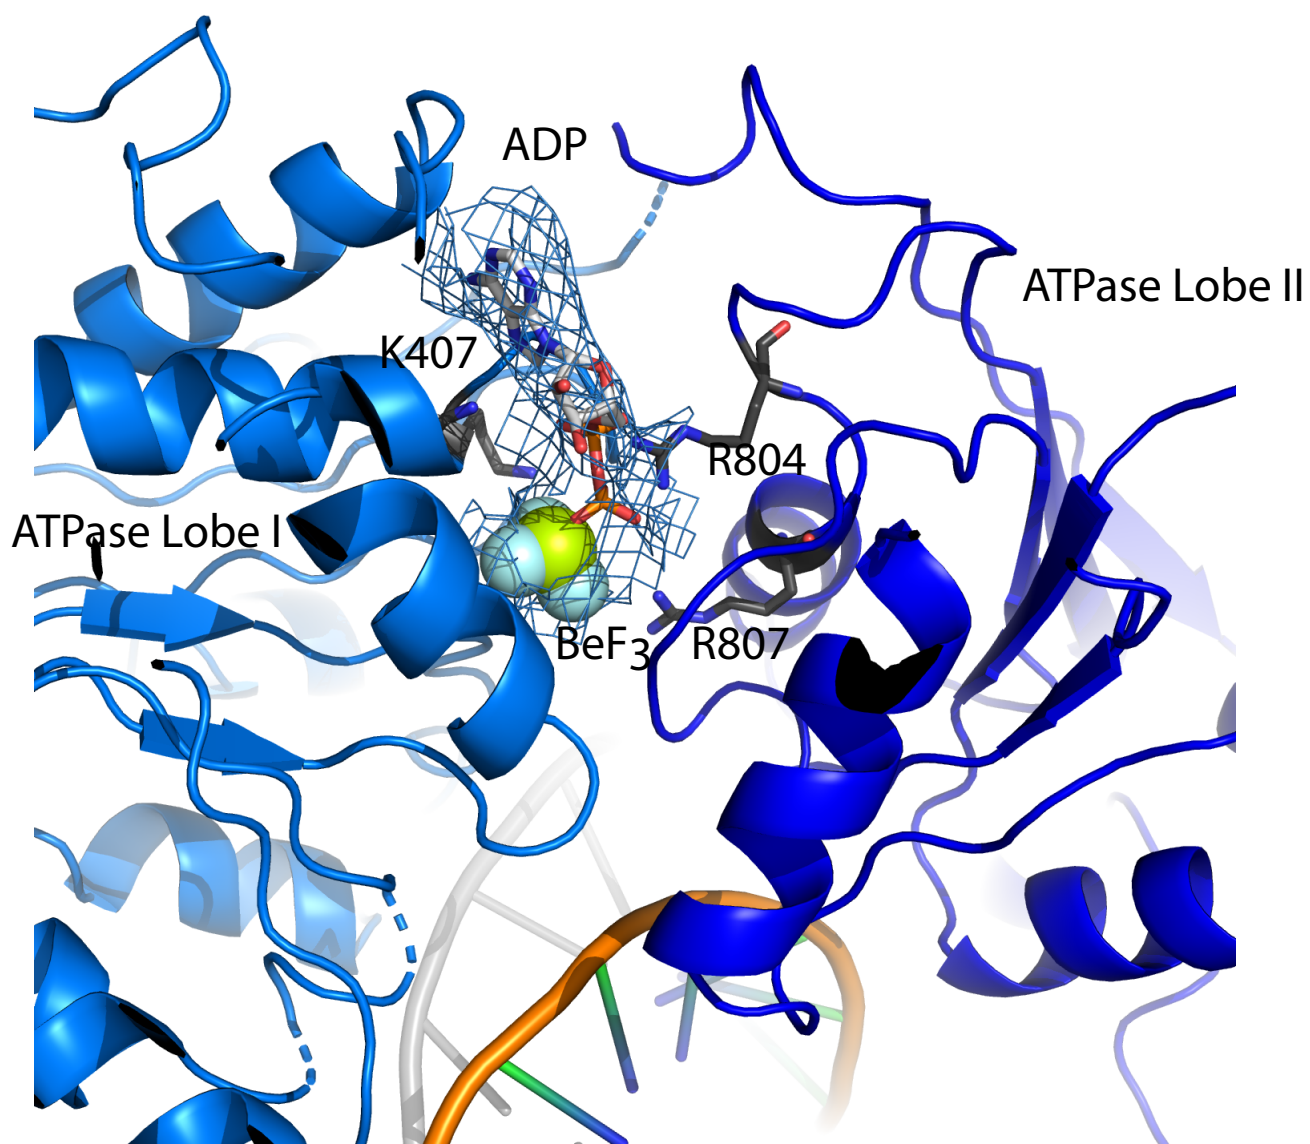

Supplement: supp [file elife-35720-supp-v1.zip]

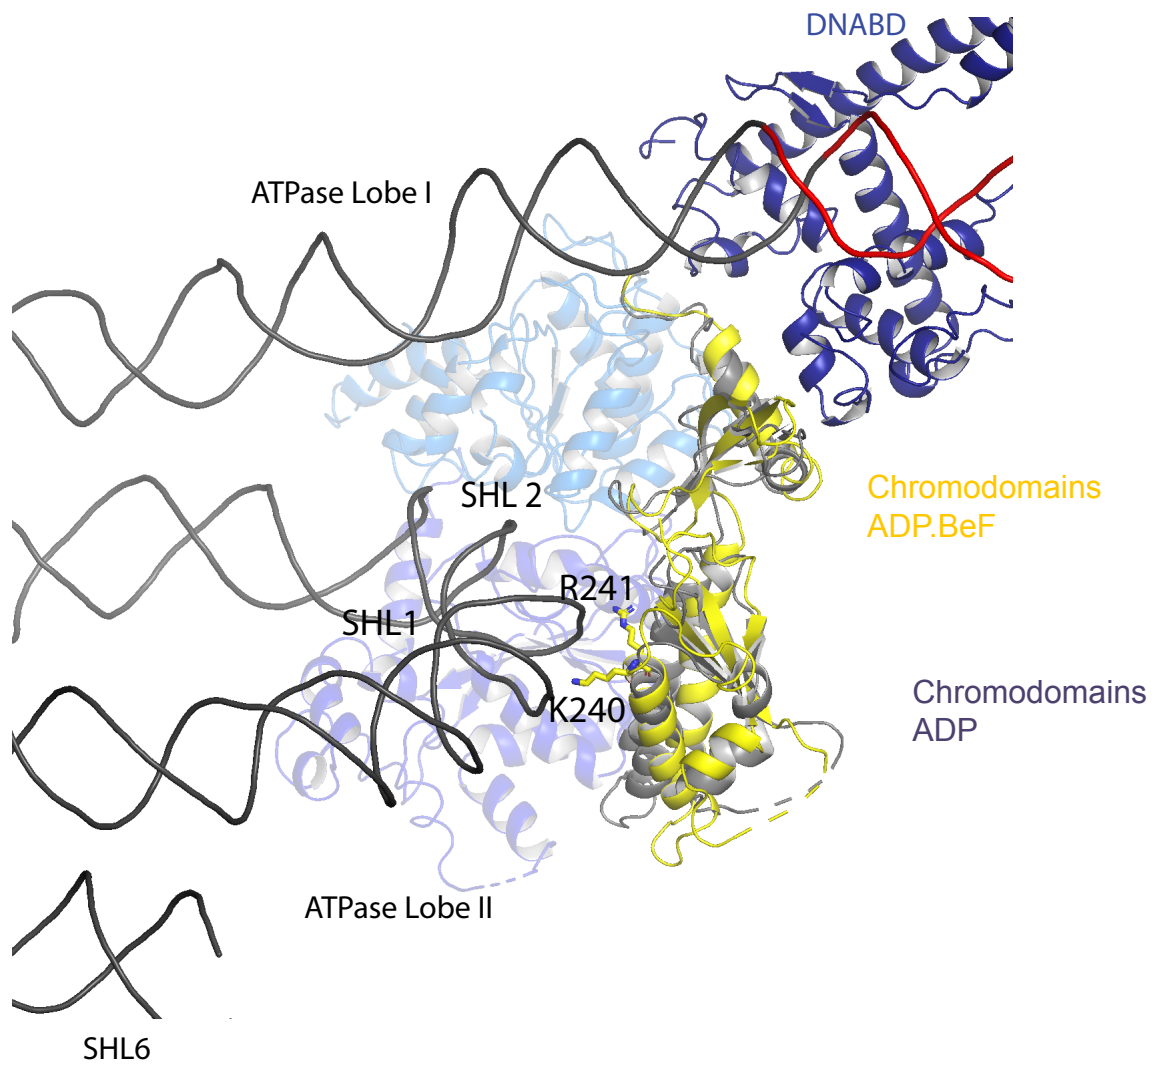

Supplement: supp [file elife-35720-supp-v1.zip]

A

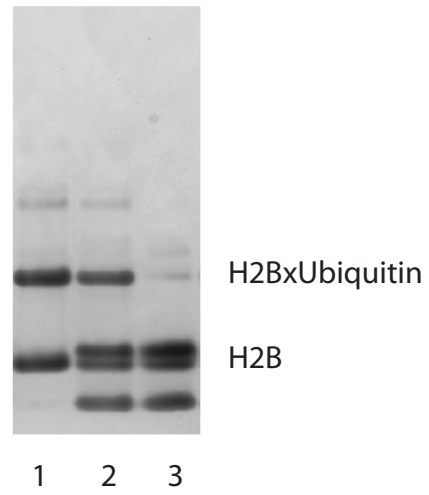

B

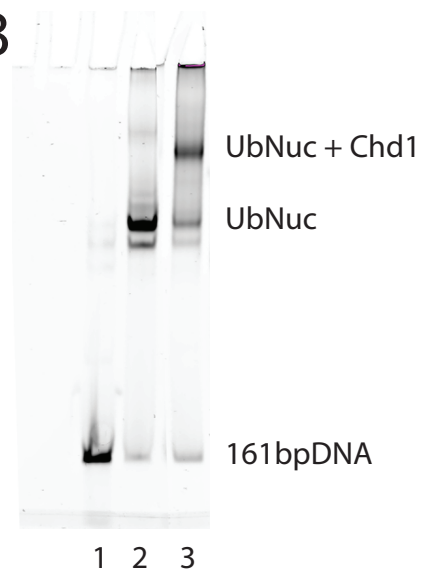

Supplement: supp [file elife-35720-supp-v1.zip]

A

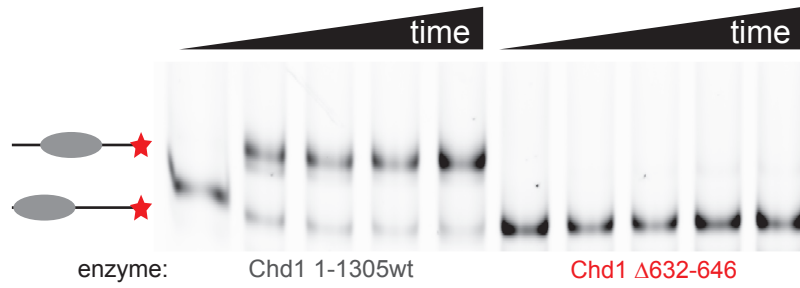

B

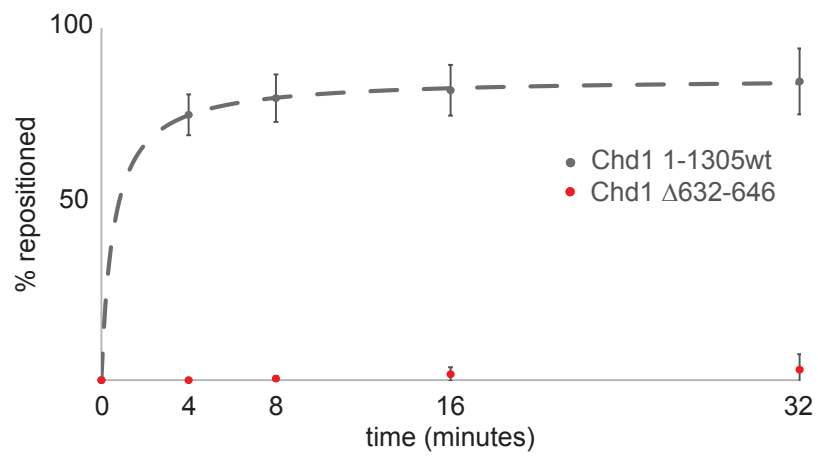

Supplement: supp [file elife-35720-supp-v1.zip]

A

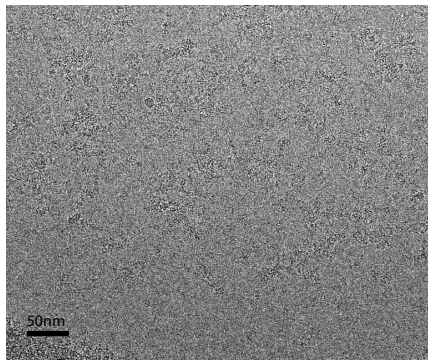

B

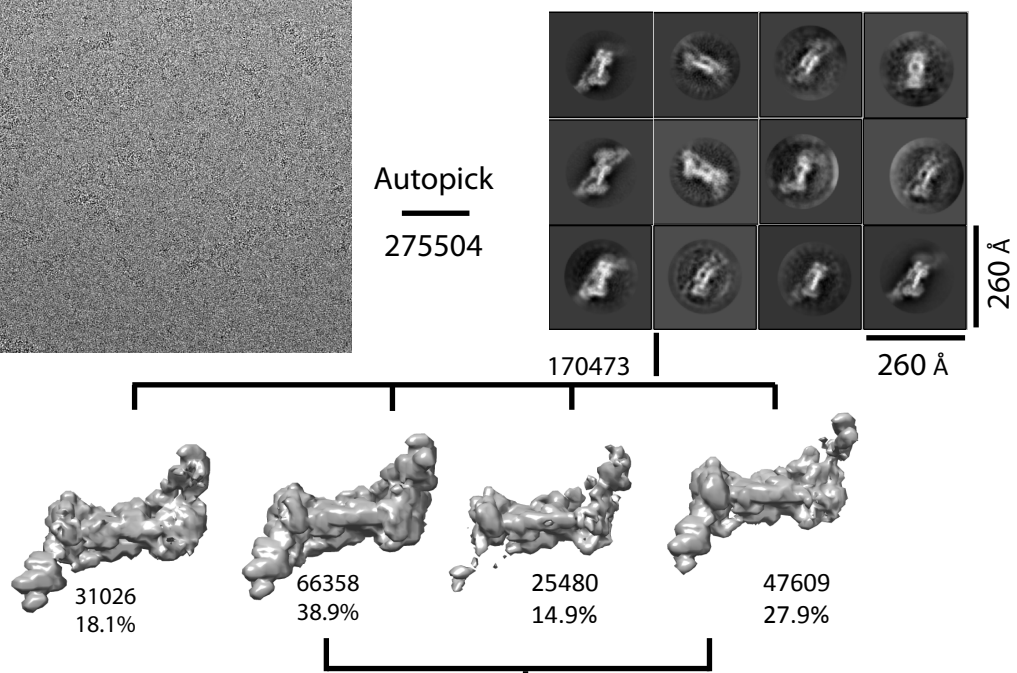

C

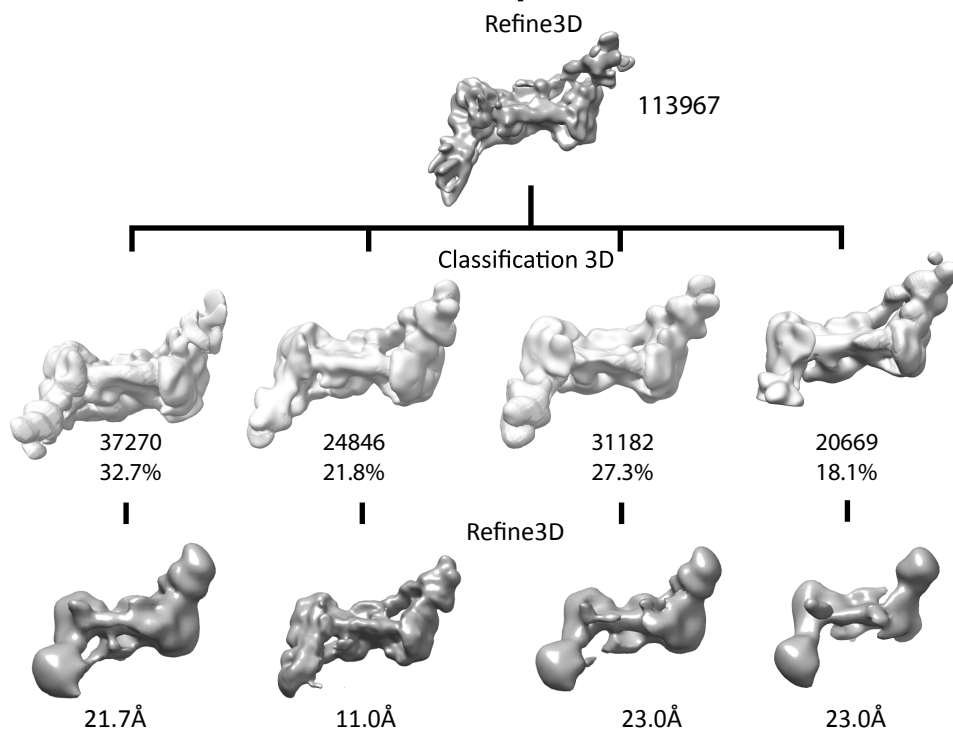

D

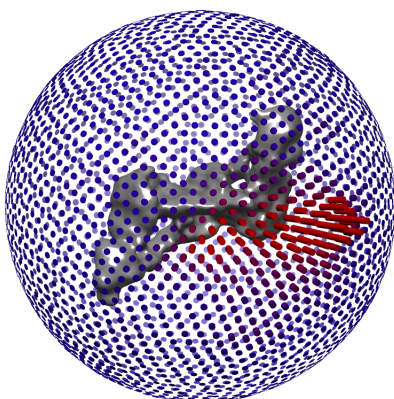

E

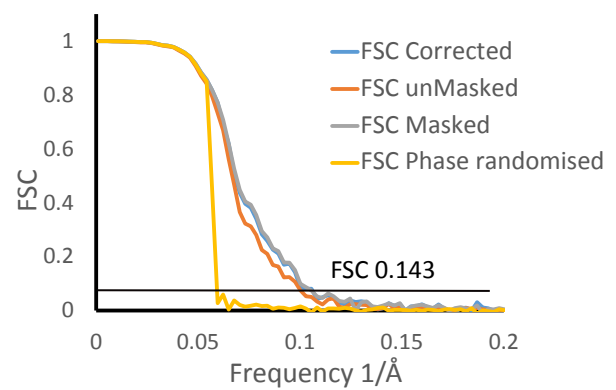

Supplement: supp [file elife-35720-supp-v1.zip]

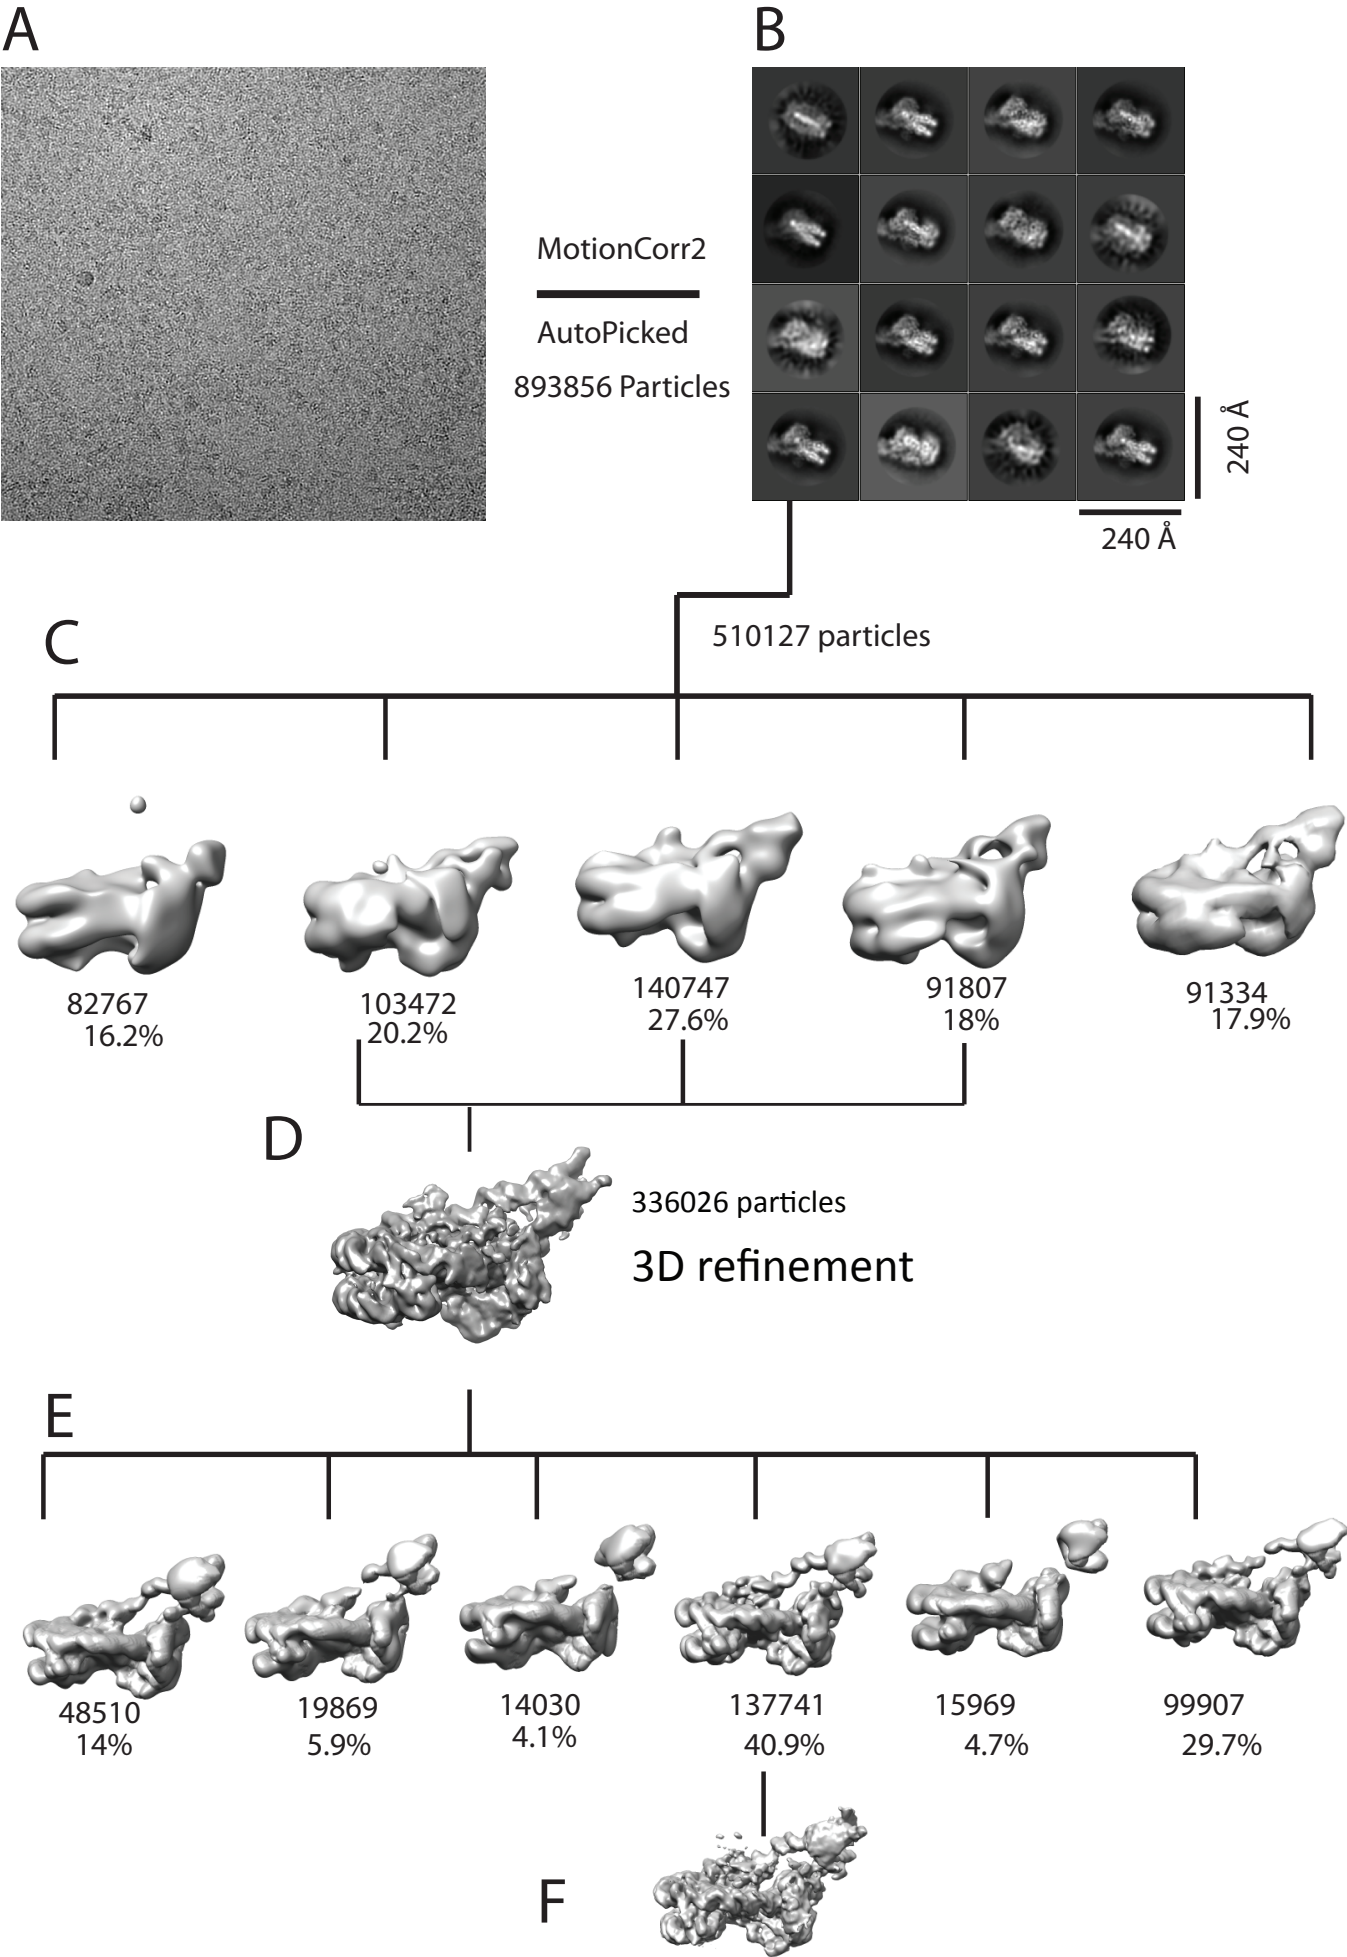

Supplement: supp [file elife-35720-supp-v1.zip]

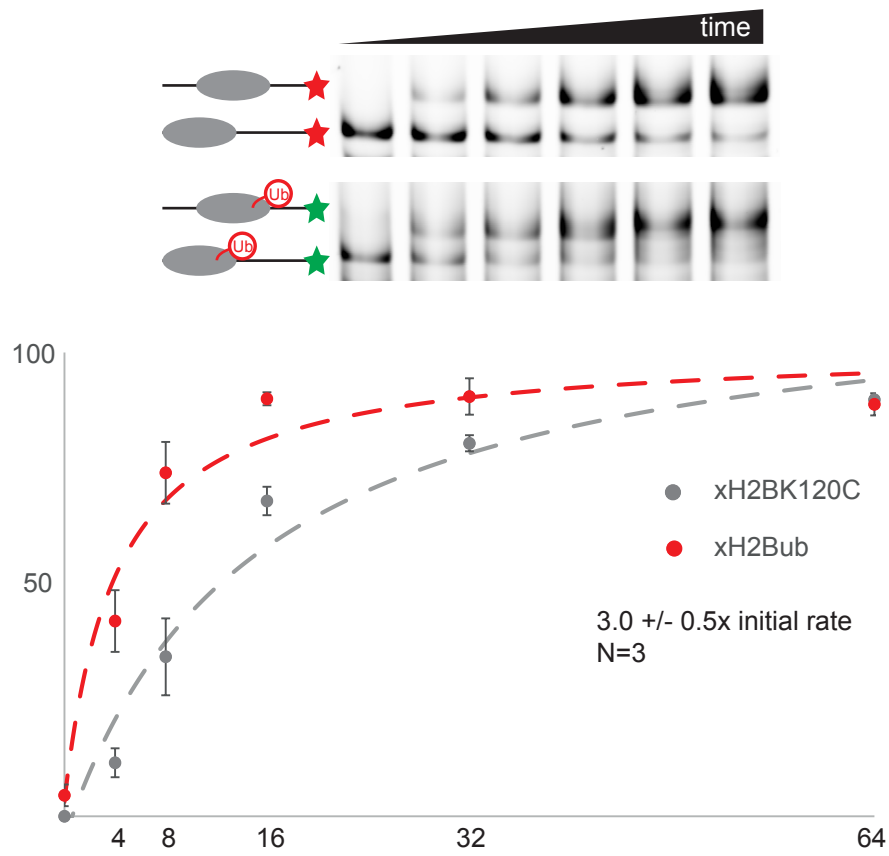

Supplement: supp [file elife-35720-supp-v1.zip › elife_poa_e35720_Figure_8_figure_supplement_2.pdf]

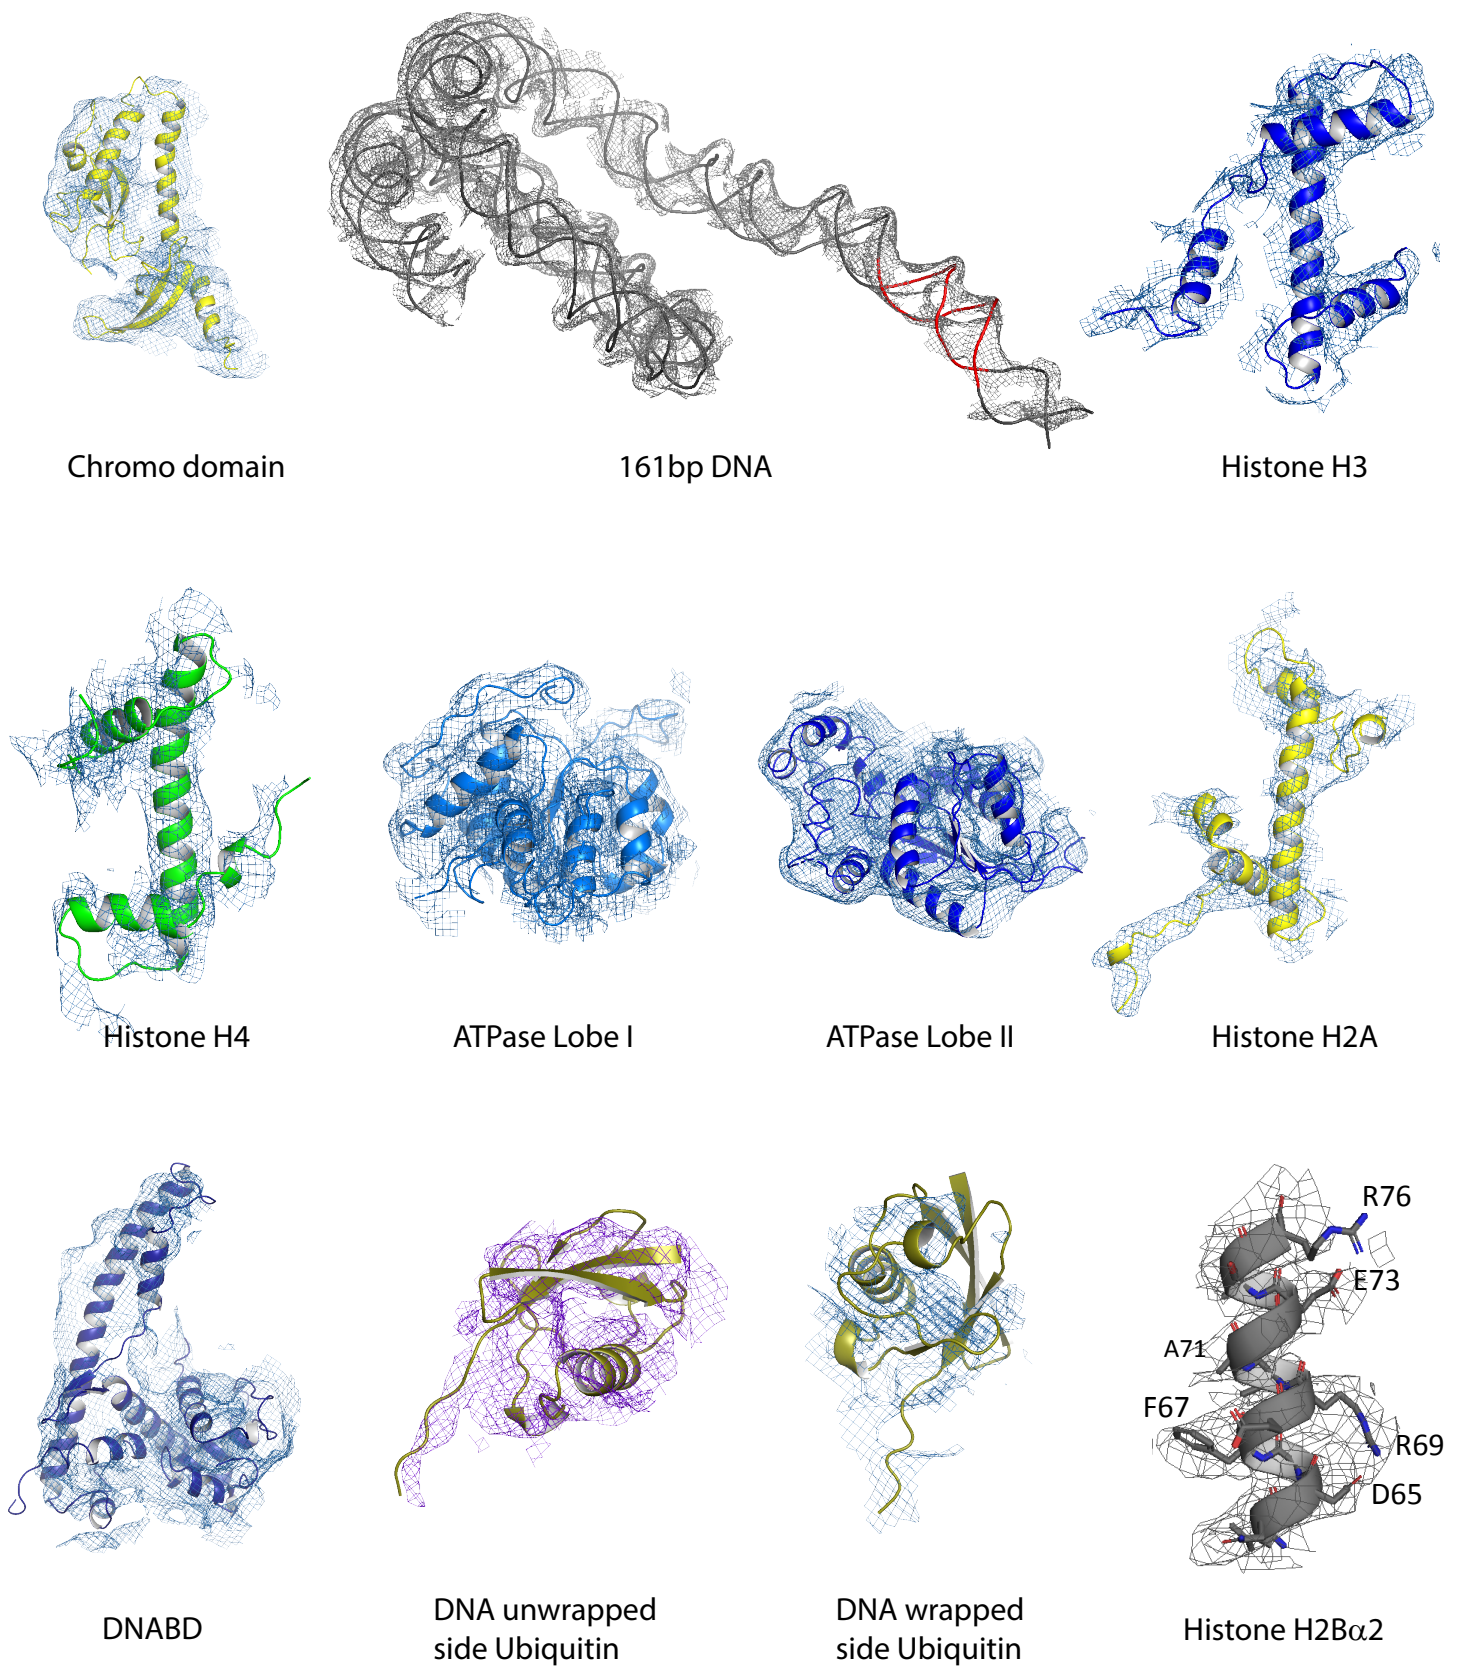

Supplement: supp [file elife-35720-supp-v1.zip]

A

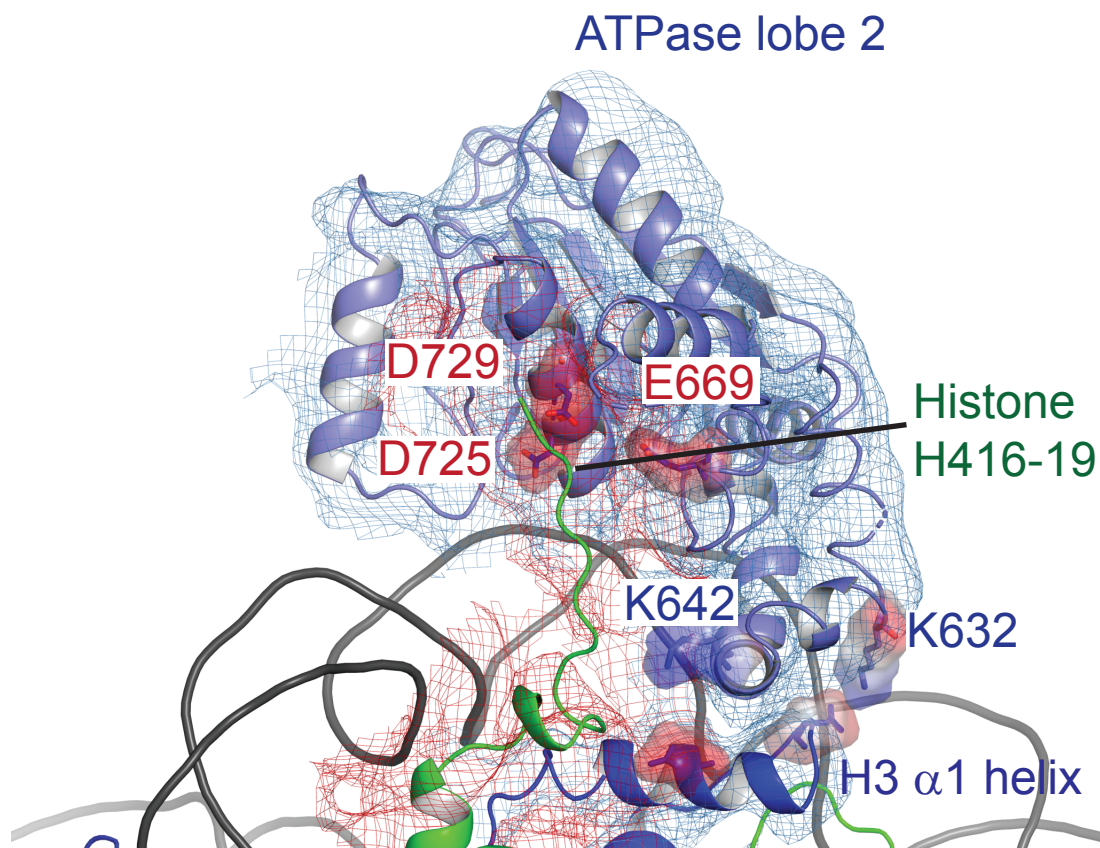

B

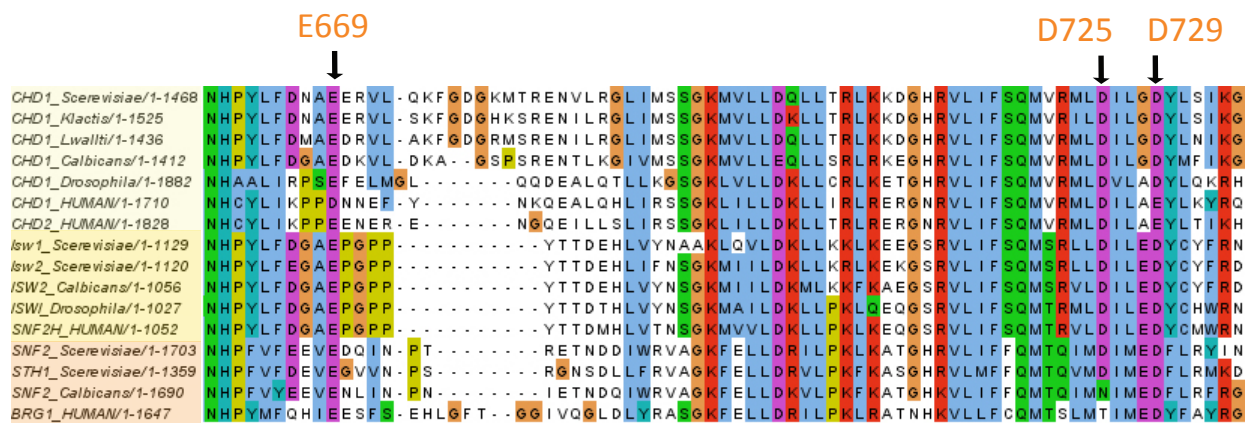

C

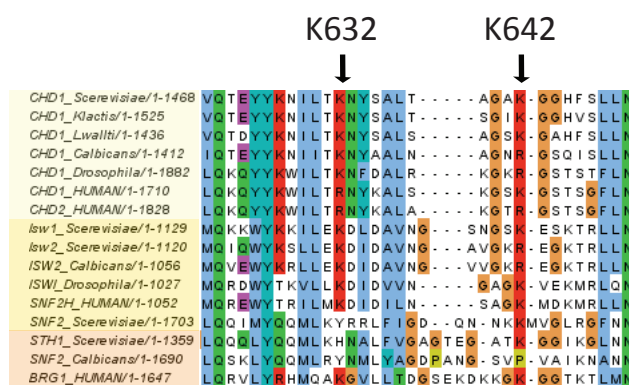

Supplement: supp [file elife-35720-supp-v1.zip]
